# Supplementary material for: Synthesis of sustainable lignin-derived mesoporous carbon for supercapacitors using a nano-sized MgO template coupled with Pluronic F127
Source: Royal Society of Chemistry journal article supplement (doi:10.1039/c7ra09464g), 2017-01-01
Supplement: c7ra09464g1.pdf [file c7ra09464g1.pdf]

## Supplementary

### Synthesis of sustainable lignin-derived mesoporous carbons for supercapacitor by nano-sized MgO template coupled with Pluronic F127

Yaoguang Song, Junli Liu\*, Kang Sun, Wei Xu

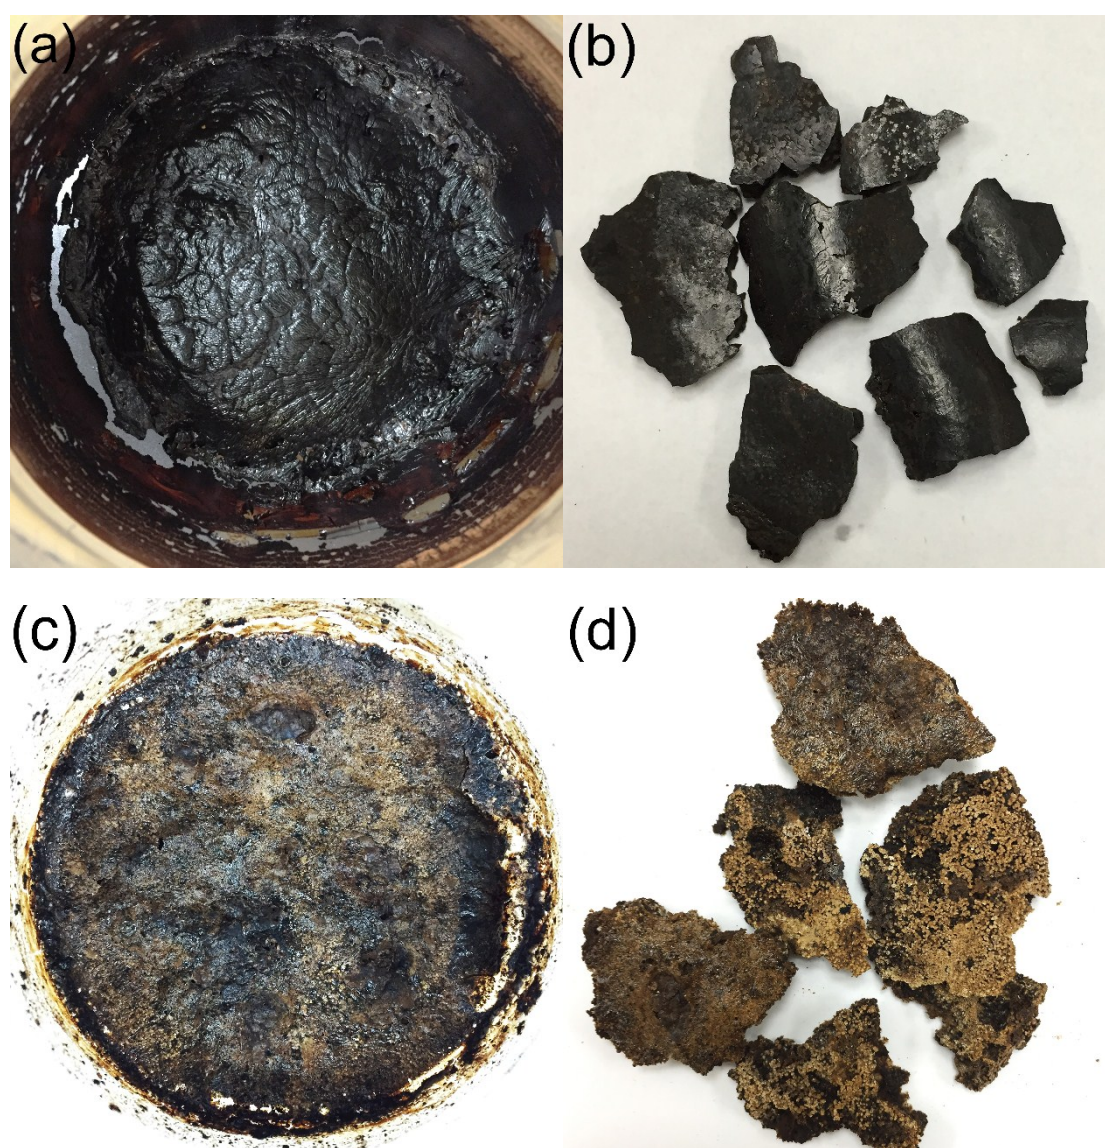

Fig. S1 (a, b) Homogeneous chocolate-like dried precursors composite via dual templating method; (c, d) sample LMC<sub>MgO</sub> before carbonization

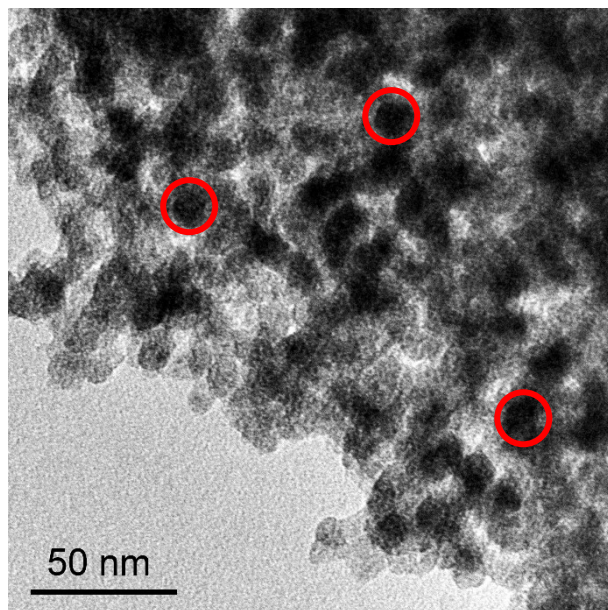

Fig. S2 TEM micrograph for LMC<sub>10-1-16</sub> before MgO extraction

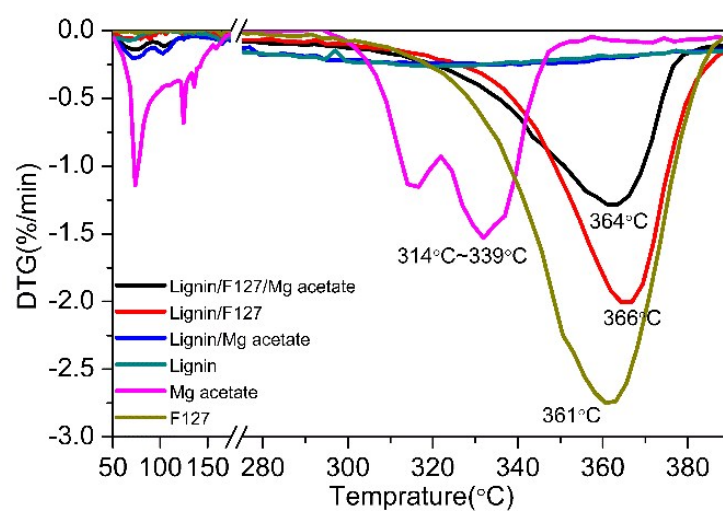

Fig. S3 Derivative thermogravimetric curves of lignin, templates and mixtures of precursor



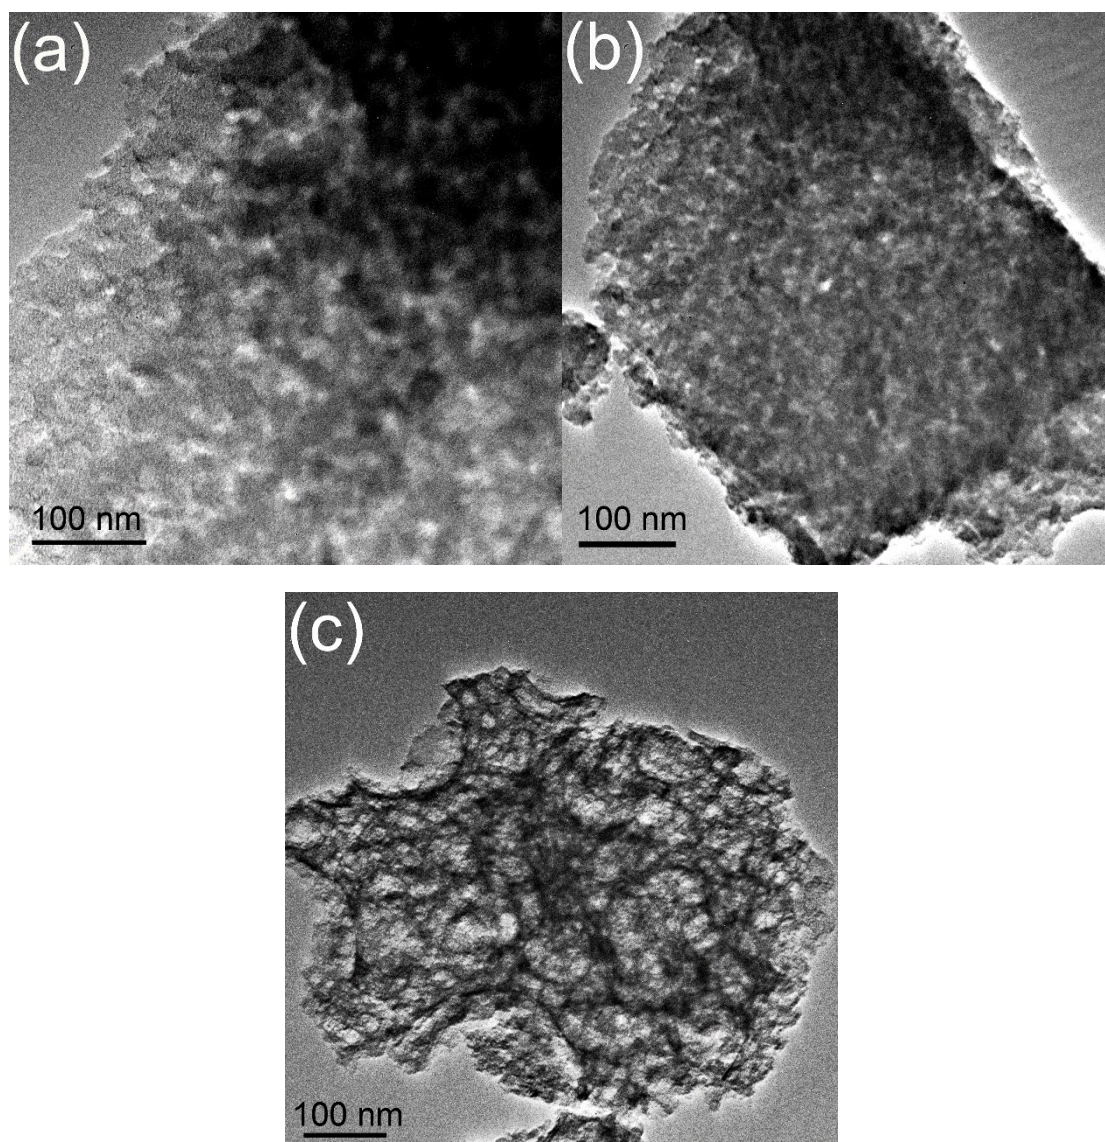

Fig. S4 TEM micrographs for (a)  $\text{LMC}_{\text{MgO}}$ , (b) LC, and (c)  $\text{LMC}_{10-8-16, \text{F}}$

The peak intensity of D band and G band, as well as its corresponding I(D)/I(G), for LMC<sub>F127</sub>, LMC<sub>MgO</sub>, LMC<sub>10-8-16</sub>, LMC<sub>10-8-16, V</sub> and LMC<sub>10-8-16, F</sub> were obtained from Raman spectra, respectively. Details for the I<sub>D</sub>/I<sub>G</sub> value are listed in Table S1.

Table S1 I(D), I(G) and corresponding I(D)/I(G) for obtained carbons

| Sample                    | I(D)  | I(G)  | I(D)/I(G) |
|---------------------------|-------|-------|-----------|
| LMC <sub>F127</sub>       | 44.01 | 42.84 | 1.027     |
| LMC <sub>MgO</sub>        | 39.37 | 37.05 | 1.063     |
| LMC <sub>10-8-16</sub>    | 60.73 | 59.76 | 1.016     |
| LMC <sub>10-8-16, V</sub> | 19.64 | 19.95 | 0.985     |
| LMC <sub>10-8-16, F</sub> | 28.32 | 28.78 | 0.984     |

Table S2 Surface oxygen content of XPS measurements for obtained carbons

| times   | LMC <sub>F127</sub> |       | LMC <sub>MgO</sub> |       | LMC <sub>10-8-16</sub> |       | LMC <sub>10-8-16, V</sub> |       | LMC <sub>10-8-16, F</sub> |       |
|---------|---------------------|-------|--------------------|-------|------------------------|-------|---------------------------|-------|---------------------------|-------|
|         | C%                  | O%    | C%                 | O%    | C%                     | O%    | C%                        | O%    | C%                        | O%    |
| 1st     | 85.54               | 14.46 | 82.15              | 17.85 | 85.91                  | 14.09 | 87.17                     | 12.85 | 83.60                     | 16.40 |
| 2nd     | 82.41               | 17.59 | 75.55              | 24.45 | 81.50                  | 18.50 | 74.81                     | 25.19 | 77.43                     | 22.57 |
| 3rd     | 81.65               | 18.35 | 78.40              | 21.60 | 79.47                  | 20.53 | 83.88                     | 16.12 | 82.28                     | 17.72 |
| 4th     | 86.20               | 13.80 | 82.74              | 17.26 | 84.83                  | 15.17 | 87.48                     | 12.52 | 83.27                     | 16.73 |
| average | 83.95               | 16.05 | 79.71              | 20.29 | 82.93                  | 17.07 | 83.34                     | 16.66 | 81.64                     | 18.36 |

Cyclic voltammetry (CV) data of  $\text{LMC}_{\text{F127}}$ ,  $\text{LMC}_{\text{MgO}}$ ,  $\text{LMC}_{10-8-16}$ ,  $\text{LMC}_{10-8-16, \text{V}}$  and  $\text{LMC}_{10-8-16, \text{F}}$  was obtained at different scan rates ranging from 5 to 100 mv/s within the potential window of 0 to 0.8 V.

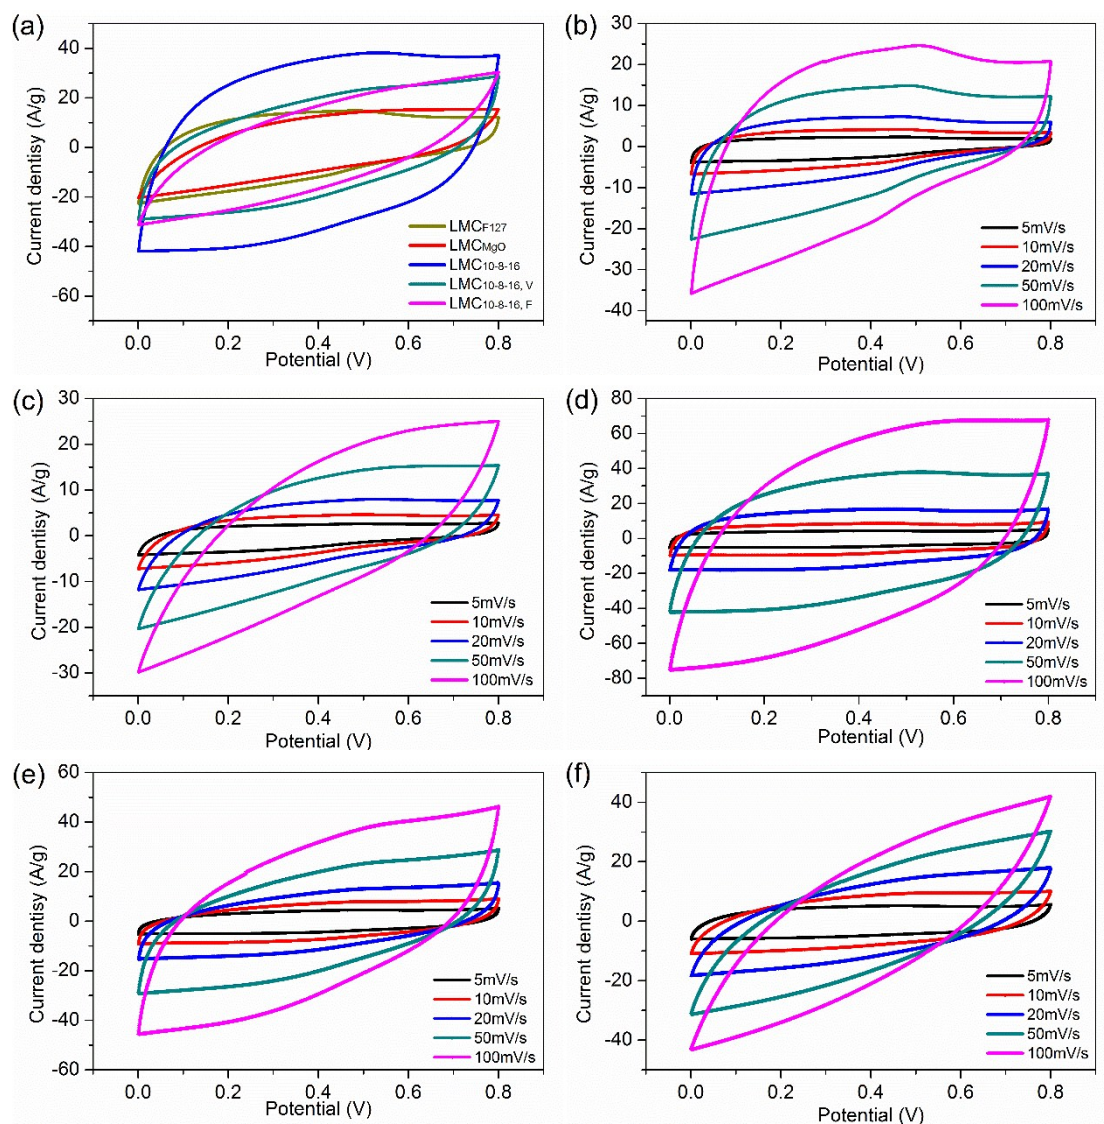

Fig. S5 Electrochemical performance of carbons determined in a three-electrode configuration: cyclic voltammograms: (a) at 50 mv/s scan rate, of (b)  $\text{LMC}_{\text{F127}}$ , (c)  $\text{LMC}_{\text{MgO}}$ , (d)  $\text{LMC}_{10-8-16}$ , (e)  $\text{LMC}_{10-8-16, \text{V}}$ , and (f)  $\text{LMC}_{10-8-16, \text{F}}$ .

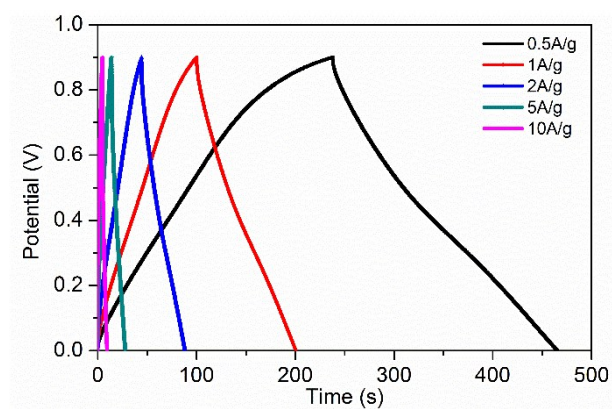

Fig. S6 Galvanostatic charge/discharge curves at different current densities ranging from 0.5 A/g to 10 A/g for LMC<sub>10-8-16</sub>
